# Supplementary material for: Black rice anthocyanins alleviate hyperlipidemia, liver steatosis and insulin resistance by regulating lipid metabolism and gut microbiota in obese mice
Source: Royal Society of Chemistry journal article supplement (doi:10.1039/d1fo01394g), 2021-01-01
Supplement: d1fo01394g1.pdf [file d1fo01394g1.pdf]

## Supplementary Material

### **Black rice anthocyanins alleviate hyperlipidemia, liver steatosis and insulin resistance by regulating lipid metabolism and gut microbiota in obese mice**

Haizhao Song<sup>a\*</sup>, Xinchun Shen<sup>a</sup>, Yang Zhou<sup>a</sup>, Xiaodong Zheng<sup>b\*</sup>

<sup>a</sup> College of Food Science and Engineering, Nanjing University of Finance and Economics, Nanjing 210023, China

<sup>b</sup> College of Biosystems Engineering and Food Science, Zhejiang University, Hangzhou 310058, China

**Corresponding authors:** Haizhao Song, College of Food Science and Engineering, Nanjing University of Finance and Economics, Nanjing 210046, China (e-mail: songhaizhaothu@nufe.edu.cn); Xiaodong Zheng, College of Biosystems Engineering and Food Science, Zhejiang University, Hangzhou 310058, China. e-mail: xdzhengatzju@163.com.

## Supplementary methods

### Preparation of BRAN

Black rice was obtained from a local market in Hangzhou, Zhejiang Province, China. Dried black rice was ground into powder, and subjected to extraction with 90% ethanol (v/v) containing 0.1% TFA and the liquid/solid ratio 12:1 (mL: g) for 90 minutes under the microwave power. Subsequently, the homogenate was kept in 4 °C for 24 h under continuous stirring. Then the extracts were centrifuged, filtered and concentrated under vacuum using a rotary evaporator. The concentrate was extracted six times with ethyl acetate, and concentrated by evaporation. Afterwards, the concentrate was loaded onto a column filled with XAD-7HP resins and eluted with distilled water, after which it was eluted with 90% ethanol containing 0.1% TFA. The elution was concentrated, and lyophilized to obtain BRAN. BRAN was analyzed by HPLC using a C18 column (4.6 mm × 250 mm, 5 μm), with A) water/formic acid (99.9:0.1, v/v) and B) acetonitrile/formic acid (99.9:0.1, v/v) as mobile phase, monitored at 520 nm. The operating conditions were listed as follows: column temperature, 30 °C; flow rate, 0.5 ml/ min; injection volume, 2 μL. The gradient program was as follows: 0 min, 5% B; 3 min, 5% B; 25 min, 40% B; 30 min, 40% B; 30.1 min, 95% B; 40 min, 95% B; 40.1 min, 5% B; 45 min, 5% B. As shown in Fig. 1, four anthocyanins were detected in BRAN. The total anthocyanin content in BRAN was 51.35 %, among of which the contents of cyanidin-3,5-diglucoside, cyanidin-3-glucoside, cyanidin-3-rutinoside and peonidin-3-glucoside were 1.01%, 89.42%, 3.10% and 6.47%, respectively (Fig. S1). Therefore, cyanidin-3-glucoside was the predominant anthocyanin in BRAN.

**Supplementary Table S1. Ingredient and composition of diets (%)**

| <b>Compositions</b>      | <b>LFD (3.85 kcal/g)</b> | <b>HFD (4.73 kcal/g)</b> |
|--------------------------|--------------------------|--------------------------|
| <b>Ingredients (g %)</b> |                          |                          |
| Sucrose                  | 33.17                    | 20.14                    |
| Casein                   | 18.96                    | 23.31                    |
| Corn starch              | 29.86                    | 8.48                     |
| Maltodextrin             | 3.32                     | 11.65                    |
| L-cystein                | 0.28                     | 0.35                     |
| Cellulose                | 4.74                     | 5.83                     |
| Lard                     | 1.9                      | 20.68                    |
| Soybean oil              | 2.37                     | 2.91                     |
| Phosphate dicalcium      | 1.23                     | 1.51                     |
| Potassium citrate        | 1.56                     | 1.92                     |
| Carbonate calcium        | 0.5                      | 0.64                     |
| Vitamin Mix              | 0.95                     | 1.16                     |
| Choline bitartrate       | 0.19                     | 0.23                     |
| Mineral Mix              | 0.95                     | 1.16                     |
| <b>Energy (kcal %)</b>   |                          |                          |
| Protein                  | 20                       | 20                       |
| Carbohydrate             | 70                       | 35                       |
| Fat                      | 10                       | 45                       |

LFD, low-fat diet; HFD, high-fat diet

**Table S2.** The primer sequences used for real-time PCR analysis.

| Gene                            | Sequence of forward primers (5' to 3') | Sequence of reverse primers (5' to 3') |
|---------------------------------|----------------------------------------|----------------------------------------|
| <i>Ppar<math>\gamma</math></i>  | CAGGAGCAGAGCAAAGAGGT                   | TGGACACCATACTTGAGCAGA                  |
| <i>Ppara</i>                    | CCTGCTTCCTGCCACTTG                     | GTTACCCTGATTCCTGATGTC                  |
| <i>Fas</i>                      | AGGGGTCGACCTGGTCCTCA                   | GCCATGCCAGAGGGTGGTT                    |
| <i>Scd1</i>                     | CCGAAGAGGCAGGTGTAGAG                   | TTCTTACACGACCACCACCA                   |
| <i>Acox1</i>                    | GTTCTCACGATGCCAATGC                    | ATGCTGGGGTTACAGGTTTG                   |
| <i>AdipoR2</i>                  | TACCAAGGAGATTTGGAGCCC                  | GCCATAAACCCCTTCATCTTCC                 |
| <i>HMGCoR</i>                   | GAGCGTGAACAAGGACCAAG                   | CAGCCATTTTGCCAGAGTTT                   |
| <i><math>\beta</math>-actin</i> | GTGCTATGTTGCTCTAGACTTCG                | ATGCCACAGGATTCCATACC                   |

*Acox1*, acyl-coenzyme A oxidase 1; *AdipoR2*, Adiponectin Receptor 2; *Fas*, fatty acid synthase; *HMGCoR*, 3-hydroxy-3-methyl-glutaryl CoA reductase; *Ppara*, peroxisome proliferator-activated receptor  $\alpha$ ; *Ppar $\gamma$* , peroxisome proliferator-activated receptor  $\gamma$ ; *Scd1*, stearoyl-CoA desaturase 1.

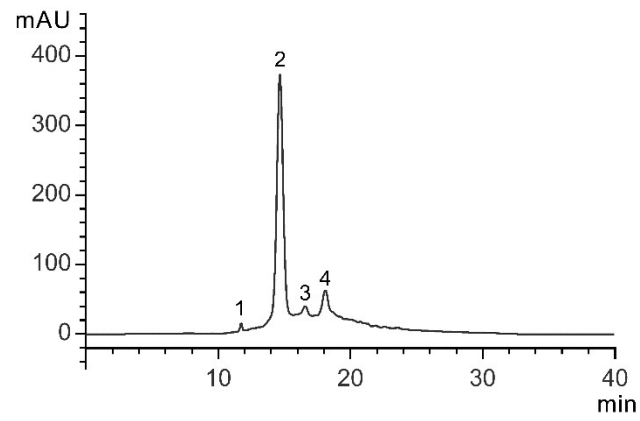

**Fig. S1.** HPLC chromatogram of black rice anthocyanins (BRAN). Detection was performed at 520 nm. Peak 1, cyanidin-3,5-diglucoside; peak 2, cyanidin-3-glucoside; peak 3, cyanidin-3-rutinoside; peak 4, peonidin-3-glucoside.
